# Supplementary material for: Targeting the Epidermal Growth Factor Receptor in Addition to Chemotherapy in Patients with Advanced Pancreatic Cancer: A Systematic Review and Meta-Analysis
Source: Int J Mol Sci. 2017 Apr 26;18(5):909. doi: 10.3390/ijms18050909 (PMC5454822; doi:10.3390/ijms18050909)
Supplement: Supplementary file 1 [file ijms-18-00909-s001.pdf]

# Supplementary Materials: Targeting the Epidermal Growth Factor Receptor in Addition to Chemotherapy in Patients with Advanced Pancreatic Cancer: A Systematic Review and Meta-Analysis

Jaseela Chiramel, Alison C. Backen, Rille Pihlak, Angela Lamarca, Melissa Frizziero, Noor-ul-Ain Tariq, Richard A. Hubner, Juan W. Valle, Eitan Amir and Mairéad G. McNamara

**Table S1.** Characteristics of the studies included in the systematic review and meta-analysis.

| Study                    | Design    | N   | Median Age | ECOG Performance Status | Presentation     | Treatment Line | Grade $\frac{3}{4}$ A/E (N) | Treatment Regimen                                                                                                                                                                                                                                                                                                                                            |
|--------------------------|-----------|-----|------------|-------------------------|------------------|----------------|-----------------------------|--------------------------------------------------------------------------------------------------------------------------------------------------------------------------------------------------------------------------------------------------------------------------------------------------------------------------------------------------------------|
| Bengala et al. 2009 [25] | Phase 1/2 | 20  | 64         | NR                      | LA = 4<br>M = 16 | 1st            | 5                           | Phase II trial of erlotinib in combination with increasing dose of gemcitabine given as fixed dose rate infusion in advanced pancreatic cancer (advanced pancreatic cancer); Gemcitabine 1500 mg/m <sup>2</sup> with an escalation of 500 mg/m <sup>2</sup> per cohort. Day 1 and 14 of a 28-day cycle, 6–8 courses. Erlotinib 100 mg/day until progression. |
| Kim et al. 2011 [26]     | Phase 2   | 93  | 61         | 0–1                     | LA = 0<br>M = 93 | 1st            | 49                          | Randomised phase II trial of panitumumab, erlotinib, and gemcitabine versus erlotinib-gemcitabine (GE) in patients with untreated, metastatic pancreatic adenocarcinoma. Panitumumab 4 mg/kg every two weeks, Erlotinib 100 mg daily, Gemcitabine 1000 mg/m <sup>2</sup> weekly on a 28-day cycle.                                                           |
| Millela et al. 2010 [27] | Phase 2   | 46  | 64         | NR                      | LA = 4<br>M = 41 | 1st            | 43                          | Phase II study of Erlotinib combined with fixed dose-rate gemcitabine (FDR-Gem) as first-line treatment for advanced adenocarcinoma of the pancreas. FDR-Gem was given weekly (1000 mg/m <sup>2</sup> at 10 mg/m <sup>2</sup> /min); Erlotinib was given orally at 100 mg/day, continuously.                                                                 |
| Modiano et al. 2012 [28] | NR        | 109 | NR         | NR                      | NR               | NR             | NR                          | Apricot-P: A randomised placebo-controlled phase II study of COX-2 inhibitor apricoxib or placebo in combination with Gemcitabine and Erlotinib in advanced or metastatic adenocarcinoma of the pancreas. Erlotinib 100 mg orally daily and apricoxib/placebo 400 mg orally daily and Gemcitabine.                                                           |

|                                      |         |     |      |     |                    |     |    |                                                                                                                                                                                                                                                                                                                                                                                              |
|--------------------------------------|---------|-----|------|-----|--------------------|-----|----|----------------------------------------------------------------------------------------------------------------------------------------------------------------------------------------------------------------------------------------------------------------------------------------------------------------------------------------------------------------------------------------------|
| Munoz<br>Llarena et al.<br>2011 [29] | Phase 2 | 62  | 63   | 0–2 | LA = 16<br>M = 46  | 1st | 22 | Gemcitabine (G) fixed-dose-rate infusion (FDR) plus Erlotinib (E) in patients with advanced pancreatic cancer (APC). G 1500 mg/m <sup>2</sup> was given by 150 min infusion (10 mg/m <sup>2</sup> /min) on days 1, 8, and 15 every 28 days combined with Erlotinib 100 mg/day orally.                                                                                                        |
| Aranda et al.<br>2012 [30]           | NR      | 153 | 63   | NR  | LA = 28<br>M = 125 | 1st | NR | Phase II open-label study of erlotinib in combination with Gemcitabine in unresectable and/or metastatic adenocarcinoma of the pancreas: relationship between skin rash and survival (Pantar study). Gemcitabine (1000 mg/m <sup>2</sup> /week, 3 weeks out of every 4 weeks) plus Erlotinib (100 mg/day orally continuously).                                                               |
| Ardavanis et al. 2009 [31]           | Phase 2 | 27  | 63   | NR  | LA = 17<br>M = 10  | 1st | 12 | Biweekly Gemcitabine (GEM) in Combination with Erlotinib (ERL): An Active and Convenient Regimen for Advanced Pancreatic Cancer. GEM (2g/m <sup>2</sup> IV every two weeks) and 100 mg ERL orally every day, for at least 12 consecutive courses (6 cycles).                                                                                                                                 |
| Cascinu et al. 2008 [32]             | Phase 2 | 84  | 63   | 0–2 | LA = 33<br>M = 61  | 1st | 33 | Cetuximab plus gemcitabine and cisplatin compared with gemcitabine and cisplatin alone in patients with advanced pancreatic cancer: a randomised, multicentre, phase II trial (SPaCe-01). Gemcitabine 1000 mg/m <sup>2</sup> + 35 mg/m <sup>2</sup> cisplatin on days 1 and 8 of a 21-day cycle +/-cetuximab (250 mg/m <sup>2</sup> weekly, after a loading dose of 400 mg/m <sup>2</sup> ). |
| El-Rayes et al. 2011 [33]            | Phase 2 | 20  | 57.9 | 0–1 | LA = 4<br>M = 16   | 1st | 21 | A phase II study of isoflavones, erlotinib, and gemcitabine in advanced pancreatic cancer. Gemcitabine 1000 mg/m <sup>2</sup> on days 1, 8, and 15, and Erlotinib 150 mg once daily orally on day 1 to day 28. Soy isoflavones (Novasoy®) were administered at a dose of 531 mg twice daily orally starting day-7 until the end of study participation.                                      |
| Feliu et al. 2011 [34]               | Phase 2 | 42  | 62   | 0–2 | LA = 6<br>M = 36   | 1st | 28 | Phase II study of a fixed dose-rate infusion of Gemcitabine in combination with Erlotinib in advanced pancreatic cancer. Gemcitabine 1200 mg/m <sup>2</sup> in 120-min infusion on days 1, 8 and 15, plus Erlotinib 100 mg orally once daily. Cycles were repeated every 28 days.                                                                                                            |

|                              |         |     |      |     |                    |         |     |                                                                                                                                                                                                                                                                                                                                                                                                                                                                                                                                                              |
|------------------------------|---------|-----|------|-----|--------------------|---------|-----|--------------------------------------------------------------------------------------------------------------------------------------------------------------------------------------------------------------------------------------------------------------------------------------------------------------------------------------------------------------------------------------------------------------------------------------------------------------------------------------------------------------------------------------------------------------|
| Heinmann et al. 2012 [35]    | Phase 3 | 274 | 64   | NR  | LA = 43<br>M = 231 | 1st/2nd | NR  | Gemcitabine plus erlotinib followed by Capecitabine versus Capecitabine plus Erlotinib followed by Gemcitabine in advanced pancreatic cancer: final results of a randomised phase 3 trial of the 'Arbeitsgemeinschaft Internistische Onkologie' (AIO-PK0104). Gemcitabine (1000 mg/m <sup>2</sup> intravenous weekly x 7, followed by 1-week rest, then weekly x 3, every 4 weeks, in combination with Erlotinib (150 mg daily) or oral Capecitabine (1000 mg/m <sup>2</sup> twice daily for 2 weeks, followed by 1-week rest) and Erlotinib (150 mg daily). |
| Hwang et al. 2012 [36]       | Phase 2 | 22  | 63   | 0–1 | LA = 3<br>M = 41   | 1st     | 22  | A phase II trial of Erlotinib in combination with Gemcitabine and Cisplatin in advanced pancreatic cancer. Erlotinib 100 mg daily, 1000 mg/m <sup>2</sup> of Gem and 25 mg/m <sup>2</sup> of Cisplatin administered on days 1 and 8, respectively, every 3 weeks.                                                                                                                                                                                                                                                                                            |
| Ko et al. 2010 [37]          | Phase 2 | 36  | 60   | 0–  | LA = 0<br>M = 36   | 2nd-4th | 36  | A phase II study of Bevacizumab plus Erlotinib for Gemcitabine-refractory metastatic pancreatic cancer. Bevacizumab 15 mg/kg every 21 days plus Erlotinib 150 mg daily.                                                                                                                                                                                                                                                                                                                                                                                      |
| Kulke et al. 2007 [38]       | Phase 2 | 30  | 60   | 0–1 | LA = 0<br>M = 30   | 2nd     | 20  | Capecitabine plus Erlotinib in Gemcitabine-refractory advanced pancreatic cancer. Capecitabine 1000 mg/m <sup>2</sup> twice daily for 2 weeks, followed by a 1-week break + Erlotinib 150 mg daily.                                                                                                                                                                                                                                                                                                                                                          |
| Kullmann et al. 2009 [39,40] | Phase 2 | 62  | 64.5 | 0–3 | LA = 0<br>M = 32   | 1st     | 61  | Cetuximab plus Gemcitabine/Oxaliplatin (GEMOXCET) in first-line metastatic pancreatic cancer: a multicentre phase II study. Cetuximab 400 mg/m <sup>2</sup> at first infusion followed by weekly 250 mg/m <sup>2</sup> combined with Gem 1000 mg/m <sup>2</sup> as a 100-min infusion on day 1 and Oxaliplatin 100 mg/m <sup>2</sup> as a 2-h infusion on day 2 every 2 weeks.                                                                                                                                                                               |
| Lopez et al. 2013 [41]       | Phase 2 | 32  | NR   | NR  | LA = 0<br>M = 62   | 1st     | 4   | Phase II trial of Erlotinib plus Capecitabine as first-line treatment for metastatic pancreatic cancer (XELTA study). Oral Capecitabine at 1,000 mg/m <sup>2</sup> twice daily on days 1–14, of a 21-day treatment cycle; and oral Erlotinib at 150 mg daily.                                                                                                                                                                                                                                                                                                |
| Moore et al. 2007 [42]       | Phase 3 | 569 | 63.9 | 0–2 | LA = 0<br>M = 32   | 1st     | 175 | Erlotinib Plus Gemcitabine Compared with Gemcitabine alone in patients with advanced pancreatic cancer: A Phase III Trial of the National Cancer Institute of Canada Clinical Trials Group. Gemcitabine (1000 mg/m <sup>2</sup> ) was given IV on days 1, 8, 15, 22, 29, 36 and 43 followed by a one-week rest in cycle 1, and on days 1, 8 and 15 in all subsequent four week cycles. Erlotinib or placebo was taken orally at 100 mg/day or 150 mg/day.                                                                                                    |

|                          |            |     |      |     |                     |     |     |                                                                                                                                                                                                                                                                                                                                                                                                                                                                                                                                                                                                                                                                              |
|--------------------------|------------|-----|------|-----|---------------------|-----|-----|------------------------------------------------------------------------------------------------------------------------------------------------------------------------------------------------------------------------------------------------------------------------------------------------------------------------------------------------------------------------------------------------------------------------------------------------------------------------------------------------------------------------------------------------------------------------------------------------------------------------------------------------------------------------------|
| Oh et al.<br>2012 [43]   | Phase 2    | 47  | 57.3 | 0–3 | LA = 138<br>M = 431 | 1st | 13  | A phase II trial of Erlotinib in combination with Gemcitabine and Capecitabine in previously untreated metastatic/recurrent pancreatic cancer: combined analysis with translational research. Erlotinib was given at a dose of 100 mg daily from Day 1 to Day 28. 1000 mg/m <sup>2</sup> of Gemcitabine was given on Day 1,8,15 and 1660 mg/m <sup>2</sup> /day of Capecitabine was given from Day 1 to 21, repeated every week.                                                                                                                                                                                                                                             |
| Okusaka et al. 2010 [44] | Phase 2    | 106 | 62   | 0–3 | LA = 0<br>M = 47    | 1st | 175 | Phase II study of Erlotinib plus Gemcitabine in Japanese patients with unresectable pancreatic cancer. Erlotinib 100 mg/day orally + Gemcitabine (1000 mg/m <sup>2</sup> intravenously) on days 1, 8 and 15 of a 28-day cycle.                                                                                                                                                                                                                                                                                                                                                                                                                                               |
| Park et al. 2013 [45]    | Phase 2    | 69  | 62   | 0–1 | LA = 18<br>M = 88   | 1st | 21  | Phase II Trial of Erlotinib plus Gemcitabine chemotherapy in Korean patients with advanced pancreatic cancer and prognostic factors for chemotherapeutic response. Erlotinib (100 mg) daily, and Gemcitabine 1000 mg/m <sup>2</sup> as infused intravenously over 30 min weekly (days 1, 8, and 15) followed by a 1-week rest per 4 weeks cycle.                                                                                                                                                                                                                                                                                                                             |
| Phillip et al. 2010 [46] | Phase 3    | 743 | 64   | 0–1 | LA = 6<br>M = 63    | 1st | 495 | Phase III Study comparing Gemcitabine plus Cetuximab versus Gemcitabine in patients with advanced pancreatic adenocarcinoma: Southwest Oncology Group–Directed Intergroup Trial S0205. Gemcitabine (intravenously, 1000 mg/m <sup>2</sup> ) weekly for 7 weeks, followed by 1 week off, then weekly for 3 out of 4 weeks thereafter. Cetuximab (intravenously at a loading dose of 400 mg/m <sup>2</sup> on week 1, followed by weekly maintenance doses of 250 mg/m <sup>2</sup> .                                                                                                                                                                                          |
| Philip et al. 2014 [47]  | Phase 1b/2 | 116 | 63   | 0–2 | LA = 160<br>M = 583 | 1st | NR  | Dual blockade of Epidermal Growth Factor Receptor and Insulin-Like Growth Factor Receptor–1 Signaling in metastatic pancreatic cancer Phase Ib and Randomised Phase II Trial of Gemcitabine, Erlotinib, and Cixutumumab versus Gemcitabine plus Erlotinib (SWOG S0727). Gem 1000 mg/m <sup>2</sup> intravenously once weekly for 3 of 4 weeks. Erlotinib 100 mg orally, daily, continuously. Phase 1b-Cixutumumab 6 mg/kg (starting dose level) was administered on days 1, 8, 15, and 22 of each 28-day cycle in addition to the Gem and Erlotinib. The starting dose of cixutumumab (6 mg/kg) in the combination was used in the randomised phase II portion of the study. |

|                             |           |     |      |     |                   |     |     |                                                                                                                                                                                                                                                                                                                                                                                                                                                                                                                          |
|-----------------------------|-----------|-----|------|-----|-------------------|-----|-----|--------------------------------------------------------------------------------------------------------------------------------------------------------------------------------------------------------------------------------------------------------------------------------------------------------------------------------------------------------------------------------------------------------------------------------------------------------------------------------------------------------------------------|
| Renouf et al. 2014 [48]     | Phase 2   | 49  | 62   | 0–2 | LA = 0<br>M = 116 | 2nd | 21  | A phase II study of erlotinib in Gemcitabine-refractory advanced pancreatic cancer. Erlotinib was given at an initial dose of 150 mg/day, and the dose was escalated by 50 mg every 2 weeks (to a maximum of 300 mg/day) until >grade 1 rash or other dose limiting toxicities occurred.                                                                                                                                                                                                                                 |
| Safran et al. 2011 [49]     | Phase 2   | 29  | 64   | 0–  | LA = 0<br>M = 29  | 1st | 31  | Lapatinib and Gemcitabine for metastatic pancreatic cancer. Gemcitabine 1000 mg/m <sup>2</sup> intravenously weekly for 3 weeks of a 4-week period, with Lapatinib 1500 mg/day orally.                                                                                                                                                                                                                                                                                                                                   |
| Stumberg et al. 2013 [50]   | Phase 2   | 186 | 63.6 | 0–2 | NR                | 1st | 0   | Phase II, randomised, double-blind placebo-controlled trial of Nimotuzumab plus Gemcitabine compared with Gemcitabine alone in patients with advanced pancreatic cancer. Gemcitabine 1000 mg/m <sup>2</sup> intravenously once weekly (days 1, 8, 15; every 28 days) and nimotuzumab: fixed dose of 400 mg once weekly as a 30 min infusion, or placebo, until progression or unacceptable toxicity.                                                                                                                     |
| Van Custem et al. 2009 [51] | Phase 3   | 607 | 61.5 | 0–2 | NR                | 1st | NR  | Phase III Trial of Bevacizumab in combination with Gemcitabine and Erlotinib in patients with metastatic pancreatic cancer. Gemcitabine 1000 mg/m <sup>2</sup> /week, Erlotinib (100 mg/day), and Bevacizumab 5 mg/kg every 2 weeks or Gemcitabine, Erlotinib and placebo.                                                                                                                                                                                                                                               |
| Watkins et al. 2014 [52]    | Phase 1/2 | 44  | 63   | 0–1 | LA = 22<br>M = 22 | 1st | 86  | The combination of a chemotherapy doublet (Gemcitabine and Capecitabine) with a biological doublet (Bev and Erlotinib) in patients with advanced pancreatic adenocarcinoma. Gemcitabine (1000 mg/m <sup>2</sup> Days 1, 8, 15), Capecitabine (1400 mg/m <sup>2</sup> Days 1–21), Erlotinib (100 mg daily) and Bevacizumab (5 mg/kg Days 1, 15) every 28 days.                                                                                                                                                            |
| Xiong et al. 2004 [53]      | Phase 2   | 41  | 61.1 | 0–1 | LA = 6<br>M = 35  | 1st | 113 | Cetuximab, a monoclonal antibody targeting the epidermal growth factor receptor, in combination with Gemcitabine for advanced pancreatic cancer: a multicenter phase II Trial. Cetuximab at an initial dose of 400 mg/m <sup>2</sup> , followed by 250 mg/m <sup>2</sup> weekly for 7 weeks. Gemcitabine was administered at 1000 mg/m <sup>2</sup> for 7 weeks, followed by 1 week of rest. In subsequent cycles, Cetuximab was administered weekly, and Gemcitabine was administered weekly for 3 weeks every 4 weeks. |
